# Supplementary material
Source: PubMed Central journal article supplement (PMC6537805)
Supplement: jamacardiol-4-455-s001.pdf [file jamacardiol-4-455-s001.pdf]

## Supplementary Online Content

Chen V, Ning H, Allen N, et al. Lifetime risks for hypertension by contemporary guidelines in African American and white men and women. *JAMA Cardiol*. Published online March 27, 2019.  
doi:10.1001/jamacardio.2019.0529

**eTable 1.** Baseline Characteristics of ARIC Study Sample by Race and Sex Group

**eTable 2.** Baseline Characteristics of CARDIA Study Sample by Race and Sex Group

**eTable 3.** Baseline Characteristics of FOS Study Sample by Race and Sex Group

**eFigure.** Cohort-Specific Cumulative Risks for HTN under AHA/ACC Threshold, Adjusted for Cohort Baseline Prevalence

**eReferences.**

This supplementary material has been provided by the authors to give readers additional information about their work.

**eTable 1. Baseline Characteristics of ARIC Study Sample by Race and Sex Group**

|                                   | <b>AAM</b>   | <b>AAW</b>   | <b>WM</b>    | <b>WW</b>    |
|-----------------------------------|--------------|--------------|--------------|--------------|
| Sample size (N)                   | 1222         | 1949         | 4756         | 5334         |
| Age, mean                         | 53.7 (5.9)   | 53.3 (5.8)   | 54.8 (5.7)   | 54.0 (5.7)   |
| Blood Pressure, mean (SD), mmHg   |              |              |              |              |
| Systolic                          | 129.5 (21.2) | 127.5 (20.8) | 120.0 (15.8) | 116.8 (17.5) |
| Diastolic                         | 82.5 (12.6)  | 78.1 (11.6)  | 73.2 (9.7)   | 69.5 (9.7)   |
| No. with AHA/ACC 2017 HTN (%)     | 867 (71.7)   | 1394 (71.5)  | 2180 (45.8)  | 2230 (41.8)  |
| BMI, mean (SD), kg/m <sup>2</sup> | 27.8 (4.9)   | 30.9 (6.5)   | 27.4 (3.9)   | 26.6 (5.4)   |
| TC, mean (SD), mg/dL              | 211.6 (44.2) | 218.0 (46.2) | 211.1 (38.5) | 218.3 (41.2) |
| HDL-C, mean (SD), mg/dL           | 50.3 (16.6)  | 58.0 (17.4)  | 42.9 (12.4)  | 57.6 (17.1)  |
| No. with diabetes (%)             | 194 (16.2)   | 350 (18.2)   | 405 (8.6)    | 357 (6.7)    |
| No. current smokers (%)           | 457 (37.4)   | 457 (23.5)   | 1100 (23.1)  | 1285 (24.1)  |

Abbreviations: AAM – African American men, AAW – African American women, WM – white men, WW – white women, SBP – systolic blood pressure, DBP – diastolic blood pressure, HTN – hypertension, BMI –body mass index, TC – total cholesterol, HDL-C – high-density lipoprotein cholesterol

**eTable 2. Baseline Characteristics of CARDIA Study Sample by Race and Sex Group**

|                                   | <b>AAM</b>   | <b>AAW</b>   | <b>WM</b>    | <b>WW</b>    |
|-----------------------------------|--------------|--------------|--------------|--------------|
| Sample size (N)                   | 1078         | 1409         | 1140         | 1279         |
| Age, mean                         | 24.6 (3.3)   | 24.8 (3.5)   | 25.6 (3.1)   | 25.6 (3.2)   |
| Blood Pressure, mean (SD), mmHg   |              |              |              |              |
| Systolic                          | 115.8 (10.5) | 107.9 (10.1) | 114.3 (10.2) | 104.6 (9.3)  |
| Diastolic                         | 70.8 (10.3)  | 67.2 (9.7)   | 70.8 (9.4)   | 66.1 (8.3)   |
| No. with AHA/ACC 2017 HTN (%)     | 249 (23.1)   | 175 (12.4)   | 241 (21.1)   | 85 (6.7)     |
| BMI, mean (SD), kg/m <sup>2</sup> | 24.7 (4.3)   | 26.1 (6.6)   | 24.3 (3.6)   | 23.1 (4.4)   |
| TC, mean (SD), mg/dL              | 177.1 (34.8) | 177.5 (33.5) | 177.0 (33.9) | 175.5 (31.0) |
| HDL-C, mean (SD), mg/dL           | 53.7 (13.6)  | 55.0 (12.7)  | 46.9 (11.1)  | 56.3 (13.1)  |
| No. with diabetes (%)             | 6 (0.56)     | 14 (0.99)    | 6 (0.53)     | 8 (0.63)     |
| No. current smokers (%)           | 397 (37.2)   | 444 (31.7)   | 299 (26.5)   | 336 (26.4)   |

Abbreviations: AAM – African American men, AAW – African American women, WM – white men, WW – white women, SBP – systolic blood pressure, DBP – diastolic blood pressure, HTN – hypertension, BMI –body mass index, TC – total cholesterol, HDL-C – high-density lipoprotein cholesterol

**eTable 3. Baseline Characteristics of FOS Study Sample by Race and Sex Group**

|                                   | <b>WM</b>    | <b>WW</b>    |
|-----------------------------------|--------------|--------------|
| Sample size (N)                   | 2081         | 2322         |
| Age, mean                         | 36.5 (9.5)   | 35.8 (9.4)   |
| Blood Pressure, mean (SD), mmHg   |              |              |
| Systolic                          | 125.4 (14.2) | 116.6 (14.8) |
| Diastolic                         | 81.4 (9.6)   | 75.1 (9.7)   |
| No. with AHA/ACC 2017 HTN (%)     | 1238 (59.5)  | 742 (32.0)   |
| BMI, mean (SD), kg/m <sup>2</sup> | 26.5 (3.5)   | 24.1 (4.4)   |
| TC, mean (SD), mg/dL              | 199.3 (38.2) | 191.5 (37.5) |
| HDL-C, mean (SD), mg/dL           | 44.6 (11.5)  | 56.8 (14.6)  |
| No. with diabetes (%)             | 66 (3.17)    | 28 (1.21)    |
| No. current smokers (%)           | 896 (43.3)   | 994 (42.9)   |

Abbreviations: WM – white men, WW – white women, SBP – systolic blood pressure, DBP – diastolic blood pressure, HTN – hypertension, BMI –body mass index, TC – total cholesterol, HDL-C – high-density lipoprotein cholesterol

**eFigure. Cohort-Specific Cumulative Risks for HTN under AHA/ACC Threshold, Adjusted for Cohort Baseline Prevalence**

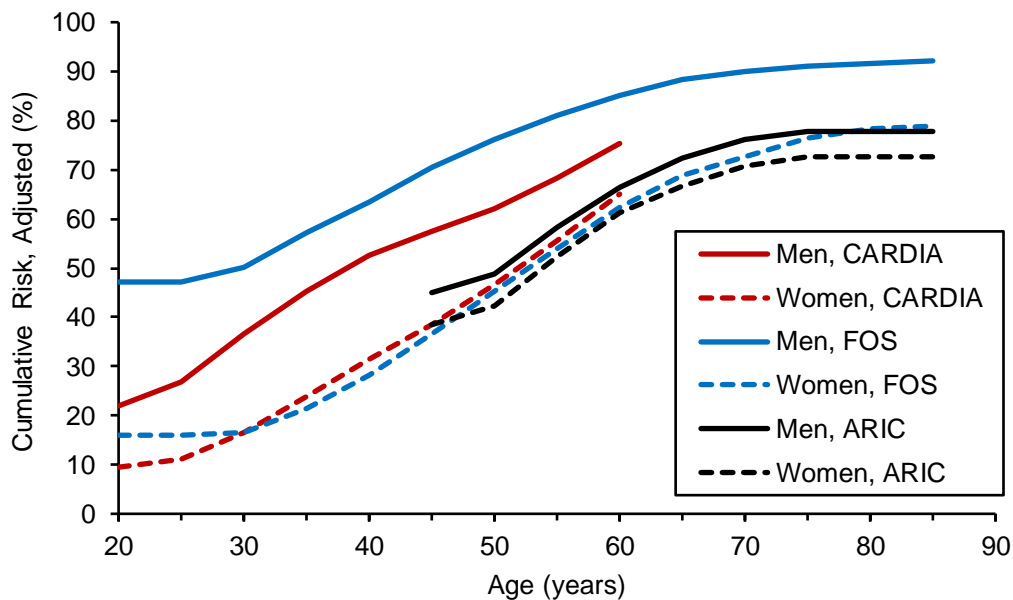

Cumulative risks for attaining BP  $\geq$ 130/80 mmHg for CARDIA (red), FOF (blue) and ARIC (black). Age-specific cumulative incidence was calculated using the practical incidence estimator (PIE) macro in 5-year groupings starting from initial ages for each cohort (20 years for CARDIA and FOS, 45 years for ARIC)<sup>1</sup>. Baseline rates of BP  $\geq$ 130/80 or BP treatment were used to adjust the initial survival rates for each cohort<sup>2</sup>. Solid lines represent cumulative risks over age for men; dotted lines represent cumulative risks for women.

## References

1. A. B, R.B. DS, S. S, et al. Computing estimates of incidence, including lifetime risk: Alzheimer's disease in the Framingham Study. The Practical Incidence Estimators (PIE) macro. *Stat Med*. 2000.
2. Pencina MJ, D'Agostino RB, Beiser AS, Cobain MR, Vasan RS. Estimating lifetime risk of developing high serum total cholesterol: Adjustment for baseline prevalence and single-occasion measurements. *Am J Epidemiol*. 2007. doi:10.1093/aje/kwk025
